# Supplementary material for: SARS-CoV-2 RNA in exhaled air of hospitalized COVID-19 patients
Source: PubMed Central journal article supplement (PMC9151771; doi:10.1038/s41598-022-13008-4), 2022-05-30
Supplement: 41598_2022_13008_MOESM1_ESM.pdf [file 41598_2022_13008_MOESM1_ESM.pdf]

## Supplementary materials for

### SARS-CoV-2 RNA in exhaled air of hospitalized COVID-19 patients

**Authors:** Lisa Kurver<sup>a</sup>, Corné H. van den Kieboom<sup>b,g</sup>, Kjerstin Lanke<sup>c</sup>, Dimitri A. Diavatopoulos<sup>b</sup>, Gijs J. Overheul<sup>c</sup>, Mihai G. Netea<sup>a,d</sup>, Jaap ten Oever<sup>a</sup>, Reinout van Crevel<sup>a</sup>, Karin Mulders-Manders<sup>a</sup>, Frank L. van de Veerdonk<sup>a</sup>, Heiman Wertheim<sup>c</sup>, Jeroen Schouten<sup>e</sup>, Janette Rahamat-Langendoen<sup>f</sup>, Ronald P. van Rij<sup>c</sup>, Teun Bousema<sup>c</sup>, Arjan van Laarhoven<sup>a\*</sup>, Marien I. de Jonge<sup>b\*</sup>

#### Affiliations:

<sup>a</sup> Department of Internal Medicine and Radboud Centre for Infectious Diseases, Radboud University Medical Center, 6525 GA, Nijmegen, The Netherlands

<sup>b</sup> Laboratory of Medical Immunology, Radboud Institute for Molecular Life Sciences, Radboud University Medical Center, 6525 GA, Nijmegen, The Netherlands

<sup>c</sup> Department of Medical Microbiology, Radboud Institute for Molecular Life Sciences, Radboud University Medical Center, 6525 GA, Nijmegen, The Netherlands

<sup>d</sup> Department of Immunology and Metabolism, Life and Medical Sciences Institute, University of Bonn, 53115 Bonn, Germany

<sup>e</sup> Department of Intensive Care Medicine, Radboud University Medical Center, 6525 GA, Nijmegen, the Netherlands

<sup>f</sup> Department of Medical Microbiology, Radboud Centre for Infectious Diseases, Radboud University Medical Center, 6525 GA, Nijmegen, the Netherlands

<sup>g</sup> Xheal Diagnostics B.V., 6525 GC Nijmegen, The Netherlands

\*These authors contributed equally to this work

Corresponding Author: Dr. Marien I. de Jonge  
Radboud University Medical Center

Geert Grooteplein Zuid 10, route 469  
6525 GA, Nijmegen, The Netherlands

Telephone number: +31 6 57 58 47 00

E-mail address: [Marien.deJonge@radboudumc.nl](mailto:Marien.deJonge@radboudumc.nl)

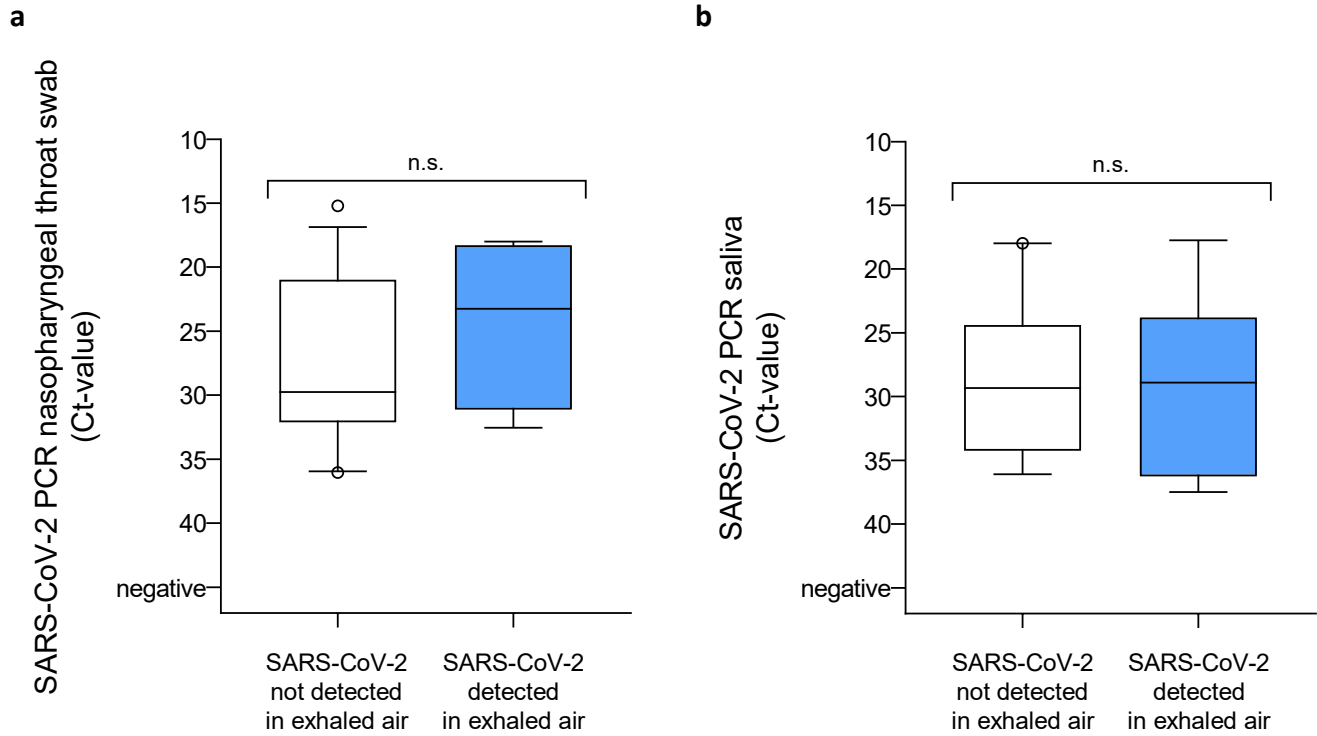

**Supplementary Figure 1: a)** Boxplot depicting SARS-CoV-2 viral RNA load measured in nasopharyngeal throat swabs for patients without and with detectable SARS-CoV-2 RNA in the exhaled air sample. **b)** Boxplot depicting SARS-CoV-2 viral RNA load measured in saliva for patients without and with detectable SARS-CoV-2 RNA in the exhaled air sample. No significant differences were found.

Filled boxes represent the group in which SARS-CoV-2 RNA was detected in exhaled air samples. Open boxes represent the group in which SARS-CoV-2 RNA was not detected in exhaled air samples.
